# Supplementary material for: A chemically consistent rate constant for the reaction of nitrogen dioxide with the oxygen atom
Source: Royal Society of Chemistry journal article supplement (doi:10.1039/d0cp05131d), 2020-12-17
Supplement: d0cp05131d1.pdf [file d0cp05131d1.pdf]

## A Consistent Rate Constant for the Reaction of Nitrogen Dioxide with Oxygen Atom

Yan Li<sup>a</sup>, Sandra Javoy<sup>b</sup>, Remy Mevel<sup>c</sup>, and Xuefei Xu<sup>a</sup>

<sup>a</sup> *Center for Combustion Energy, Department of Energy and Power Engineering, and Key Laboratory for Thermal Science and Power Engineering of Ministry of Education, Tsinghua University, Beijing 100084, China*

<sup>b</sup> *University of Orléans, Department of Chemistry, 1, Rue de Chartres, BP 6759, 45067 Orléans Cedex 02, France.*

<sup>c</sup> *Center for Combustion Energy, School of Vehicle and Mobility, and State Key Laboratory for Automotive Safety and Energy, Tsinghua University, Beijing 100084, China*

This supplemental material includes summary tables of the rate constant data we employed to update the rate constant of the reaction  $\text{NO}_2 + \text{O} = \text{NO} + \text{O}_2$ . The cartesian coordinates and absolute electronic energies of the optimized structures are then given. Finally, we are proposing a large selection of modeling results for various hydrogen- $\text{NO}_x$  mixtures.

# 1 Rate constant data

Table 1: The calculated rate constants  $k$  for the reaction of  $\text{NO}_2 + \text{O} = \text{NO} + \text{O}_2$  in the temperature range of 1000-3000 K.

| T (K)  | $k$ ( $\text{cm}^3\text{mol}^{-1}\text{s}^{-1}$ ) |
|--------|---------------------------------------------------|
| 200    | 6.56E+12                                          |
| 298.15 | 2.77E+12                                          |
| 300    | 2.74E+12                                          |
| 400    | 1.94E+12                                          |
| 500    | 1.69E+12                                          |
| 600    | 1.62E+12                                          |
| 800    | 1.70E+12                                          |
| 1000   | 1.93E+12                                          |
| 1060   | 2.01E+12                                          |
| 1200   | 2.22E+12                                          |
| 1400   | 2.57E+12                                          |
| 1600   | 2.95E+12                                          |
| 1780   | 3.32E+12                                          |
| 1800   | 3.37E+12                                          |
| 2000   | 3.81E+12                                          |
| 2300   | 4.52E+12                                          |
| 2500   | 5.01E+12                                          |
| 2700   | 5.53E+12                                          |
| 3000   | 6.32E+12                                          |

Table 2: The rate constants from the experimental data by Estupian et al. (2001EST/NIC9697-9703) [1].

| T (K) | $k$ ( $\text{cm}^3\text{mol}^{-1}\text{s}^{-1}$ ) |
|-------|---------------------------------------------------|
| 221   | 8.74E+12                                          |
| 230   | 8.33E+12                                          |
| 240   | 7.93E+12                                          |
| 294   | 6.43E+12                                          |
| 296   | 6.39E+12                                          |
| 298   | 6.35E+12                                          |
| 300   | 6.31E+12                                          |
| 339   | 5.69E+12                                          |
| 350   | 5.54E+12                                          |
| 357   | 5.46E+12                                          |
| 360   | 5.42E+12                                          |
| 387   | 5.14E+12                                          |
| 412   | 4.93E+12                                          |

|     |          |
|-----|----------|
| 413 | 4.92E+12 |
| 420 | 4.87E+12 |
| 425 | 4.83E+12 |

---

## 2 Molecules geometry and electronic energy

Cartesian coordinates and absolute electronic energies of optimized structures by TPSSh/MG3S.

NO<sub>2</sub>: -205.15783408 a.u.

| Atomic type | Coordinates (Å) |             |             |
|-------------|-----------------|-------------|-------------|
|             | X               | Y           | Z           |
| N           | 0.00000000      | 0.00000000  | 0.32226700  |
| O           | 0.00000000      | 1.10224000  | -0.14099200 |
| O           | 0.00000000      | -1.10224000 | -0.14099200 |

O: -75.09350623 a.u.

| Atomic type | Coordinates (Å) |            |            |
|-------------|-----------------|------------|------------|
|             | X               | Y          | Z          |
| O           | 0.00000000      | 0.00000000 | 0.00000000 |

TS (<sup>2</sup>A''): -280.2537811 a.u.

| Atomic type | Coordinates (Å) |             |            |
|-------------|-----------------|-------------|------------|
|             | X               | Y           | Z          |
| N           | -0.91641900     | 0.04937100  | 0.00000000 |
| O           | -0.89045000     | -1.13187600 | 0.00000000 |
| O           | 1.69231700      | 0.22113400  | 0.00000000 |
| O           | 0.00000000      | 0.86754200  | 0.00000000 |

NO: -129.93885904 a.u.

| Atomic type | Coordinates (Å) |            |             |
|-------------|-----------------|------------|-------------|
|             | X               | Y          | Z           |
| N           | 0.00000000      | 0.00000000 | -0.61327300 |
| O           | 0.00000000      | 0.00000000 | 0.53661400  |

O<sub>2</sub>: -150.37872792 a.u.

| Atomic type | Coordinates (Å) |            |             |
|-------------|-----------------|------------|-------------|
|             | X               | Y          | Z           |
| O           | 0.00000000      | 0.00000000 | 0.60415000  |
| O           | 0.00000000      | 0.00000000 | -0.60415000 |

### 3 Additional modeling results

#### 3.1 Nitrogen dioxide pyrolysis

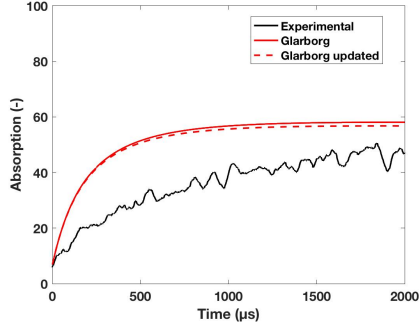

$X_{N_2O}=40.1$  ppmv;  $T=1492$  K;  $P=339$  kPa

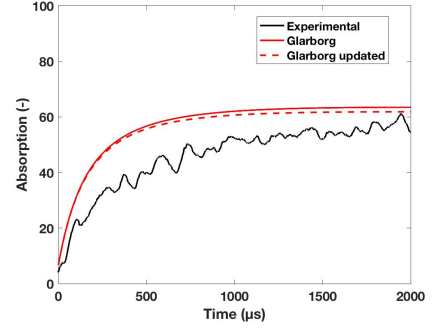

$X_{N_2O}=40.1$  ppmv;  $T=1511$  K;  $P=330$  kPa

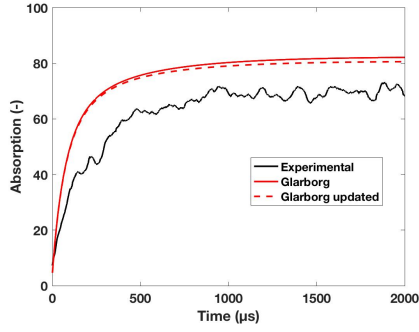

$X_{N_2O}=20$  ppmv;  $T=1648$  K;  $P=313$  kPa

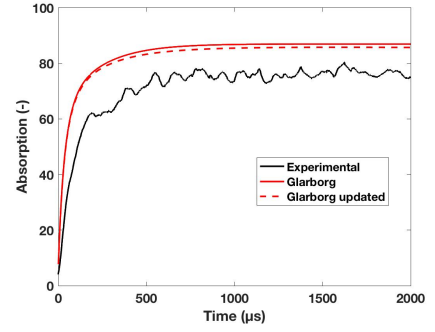

$X_{N_2O}=40.1$  ppmv;  $T=1650$  K;  $P=325$  kPa

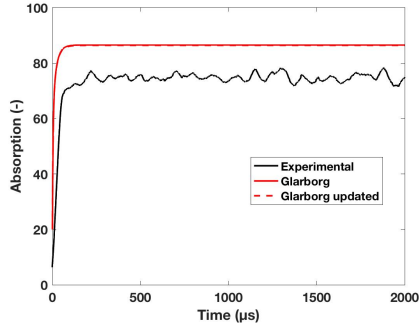

$X_{N_2O}=20$  ppmv;  $T=2019$  K;  $P=288$  kPa

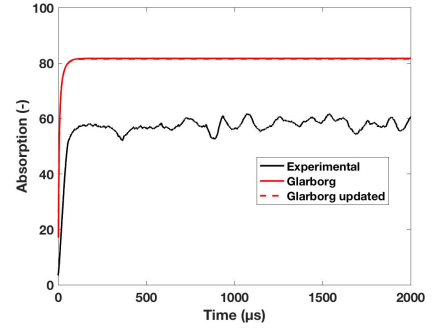

$X_{N_2O}=15$  ppmv;  $T=2053$  K;  $P=270$  kPa

Figure 1: Experimental and predicted total absorption at 130.5 nm during  $\text{NO}_2$  pyrolysis. Model of Glarborg et al. [2].

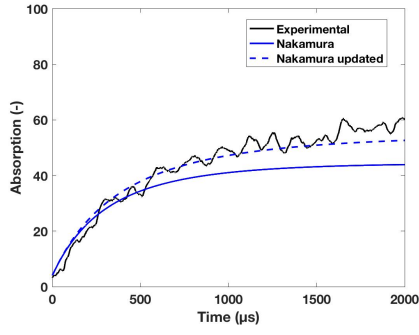

$X_{N_2O}=20$  ppmv;  $T=1564$  K;  $P=324$  kPa

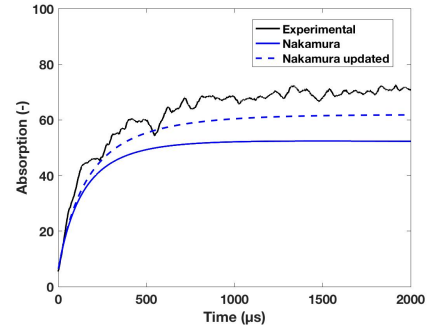

$X_{N_2O}=40.1$  ppmv;  $T=1585$  K;  $P=325$  kPa

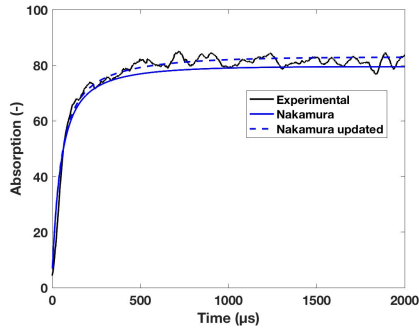

$X_{N_2O}=40.1$  ppmv;  $T=1719$  K;  $P=306$  kPa

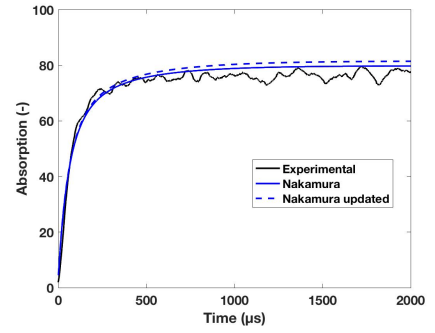

$X_{N_2O}=20$  ppmv;  $T=1769$  K;  $P=298$  kPa

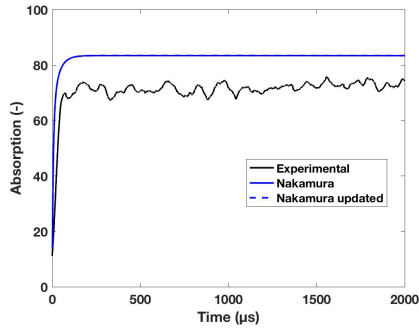

$X_{N_2O}=18$  ppmv;  $T=2117$  K;  $P=268$  kPa

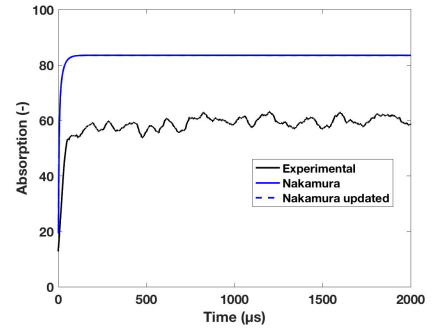

$X_{N_2O}=18$  ppmv;  $T=2187$  K;  $P=274$  kPa

Figure 2: Experimental and predicted total absorption at 130.5 nm during  $\text{NO}_2$  pyrolysis. Model of Nakamura et al. [3].

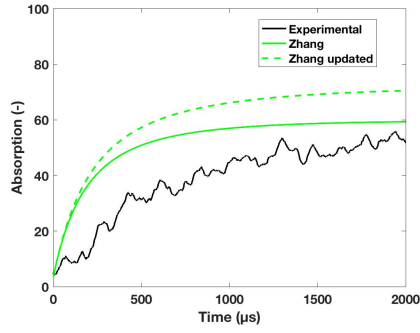

$X_{N_2O}=15$  ppmv;  $T=1598$  K;  $P=326$  kPa

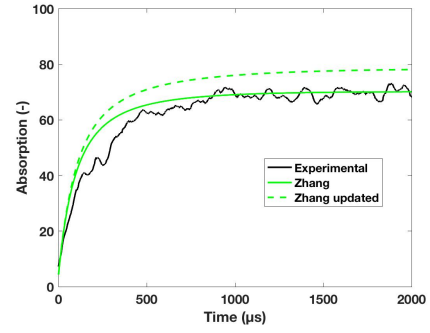

$X_{N_2O}=20$  ppmv;  $T=1648$  K;  $P=313$  kPa

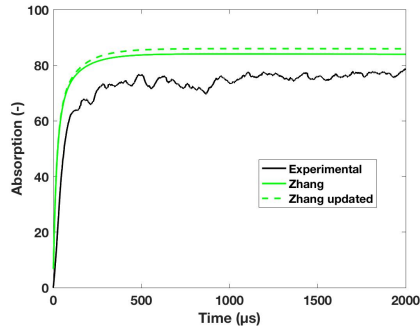

$X_{N_2O}=20$  ppmv;  $T=1830$  K;  $P=302$  kPa

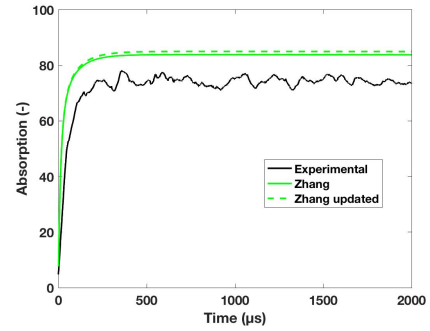

$X_{N_2O}=18$  ppmv;  $T=1896$  K;  $P=290$  kPa

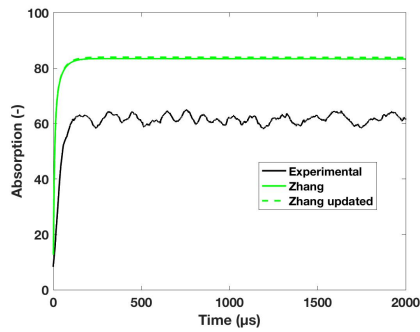

$X_{N_2O}=5$  ppmv;  $T=1877$  K;  $P=886$  kPa

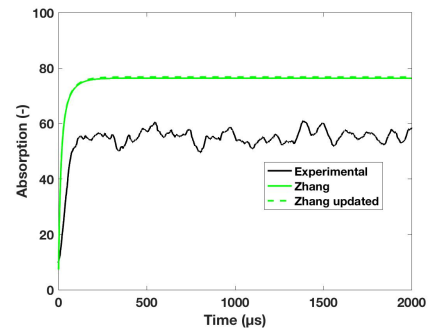

$X_{N_2O}=5$  ppmv;  $T=1896$  K;  $P=563$  kPa

Figure 3: Experimental and predicted total absorption at 130.5 nm during  $\text{NO}_2$  pyrolysis. Model of Zhang et al. [4].



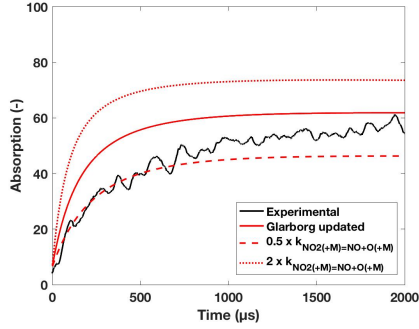

$X_{NO_2}=40.1$  ppmv;  $T=1511$  K;  $P=330$  kPa

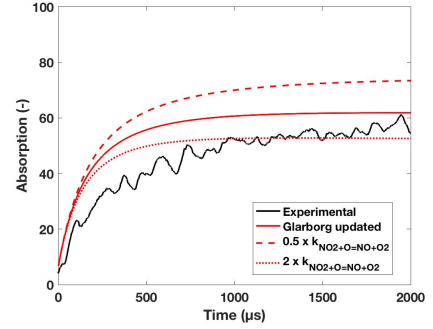

$X_{NO_2}=40.1$  ppmv;  $T=1511$  K;  $P=330$  kPa

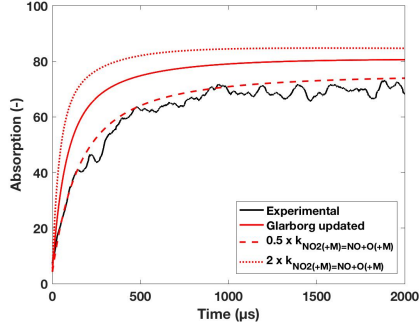

$X_{NO_2}=20$  ppmv;  $T=1648$  K;  $P=313$  kPa

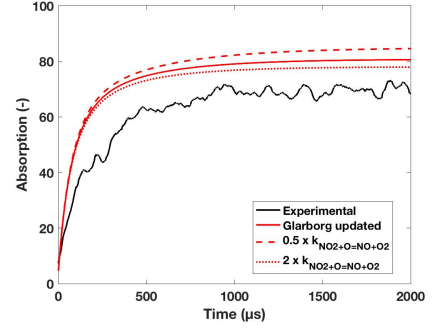

$X_{NO_2}=20$  ppmv;  $T=1648$  K;  $P=313$  kPa

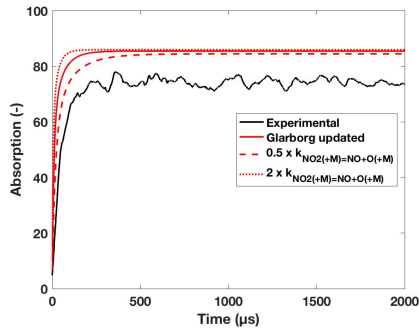

$X_{NO_2}=18$  ppmv;  $T=1896$  K;  $P=290$  kPa

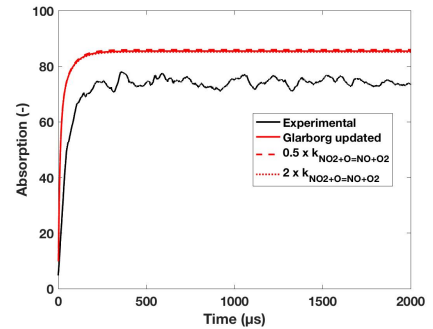

$X_{NO_2}=18$  ppmv;  $T=1896$  K;  $P=290$  kPa

Figure 4: Effect of  $k_1$  and  $k_2$  on the total absorption during  $NO_2$ -Ar mixtures pyrolysis at different temperature.  $k_1$  corresponds to the rate constant of  $NO_2(+M)=NO+O(+M)$ .  $k_2$  corresponds to the rate constant of  $NO_2+O=NO+O_2$ . Left column:  $k_1$  was perturbed. Right column:  $k_2$  was perturbed. The updated model of Glarborg et al. [2] has been used.

### 3.2 Hydrogen oxidation by nitrogen dioxide

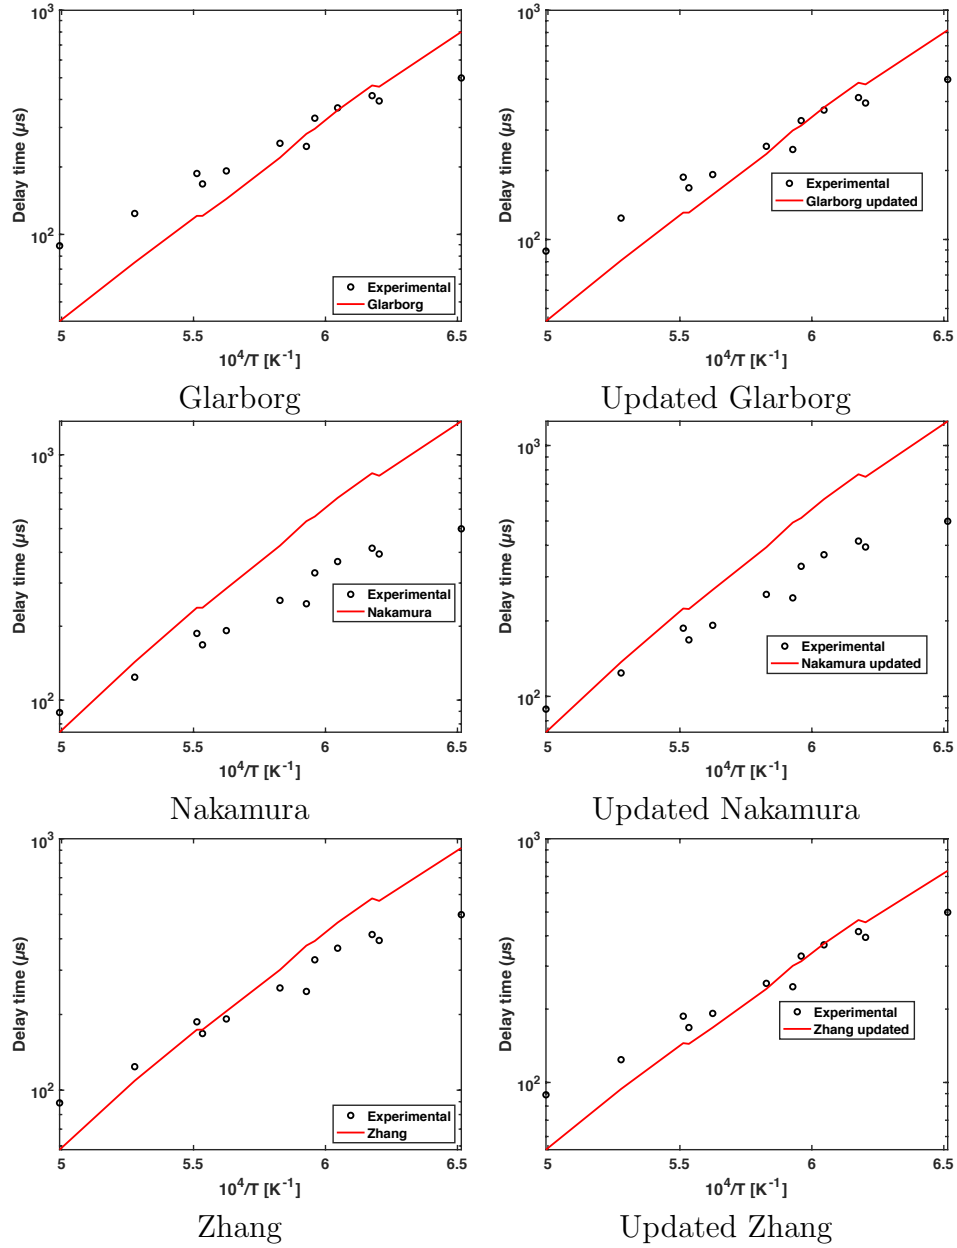

Figure 5: Experimental[5] and predicted delay-time during the oxidation of  $\text{H}_2$  by  $\text{NO}_2$ . The delay-time is defined as the time needed for the  $\text{OH}^*$  signal to decrease to 50% of the peak value. Mixture:  $X_{\text{H}_2}=0.00222$ ,  $X_{\text{NO}_2}=0.00392$ ,  $X_{\text{Ar}}=0.99386$ .  $T=1535\text{-}2003$  K;  $P=105\text{-}124$  kPa.

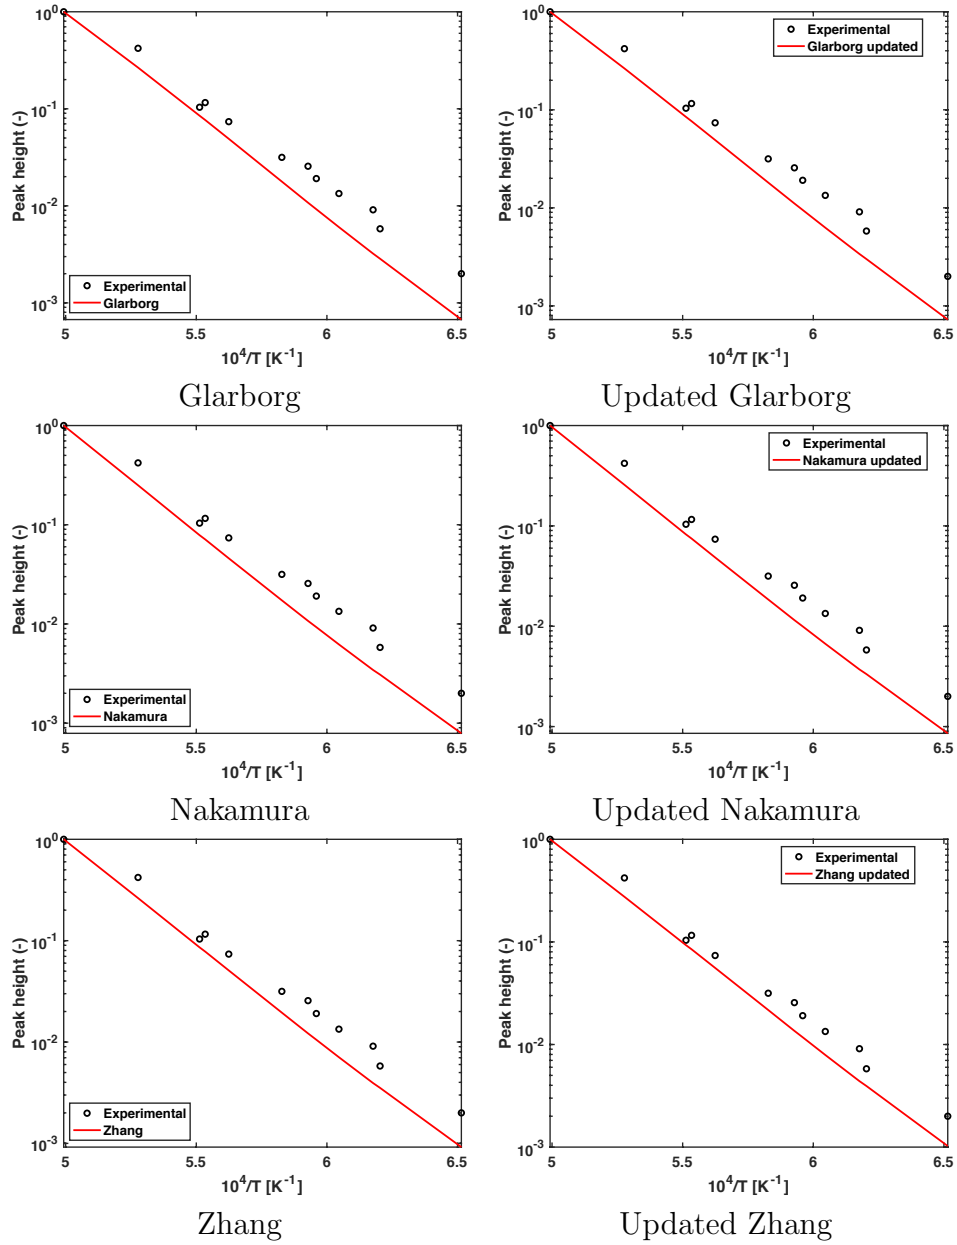

Figure 6: Experimental[5] and predicted normalized OH\* peak height during the oxidation of H<sub>2</sub> by NO<sub>2</sub>. Mixture: X<sub>H<sub>2</sub></sub>=0.00222, X<sub>NO<sub>2</sub></sub>=0.00392, X<sub>A<sub>r</sub></sub>=0.99386. T=1535-2003 K; P=105-124 kPa.

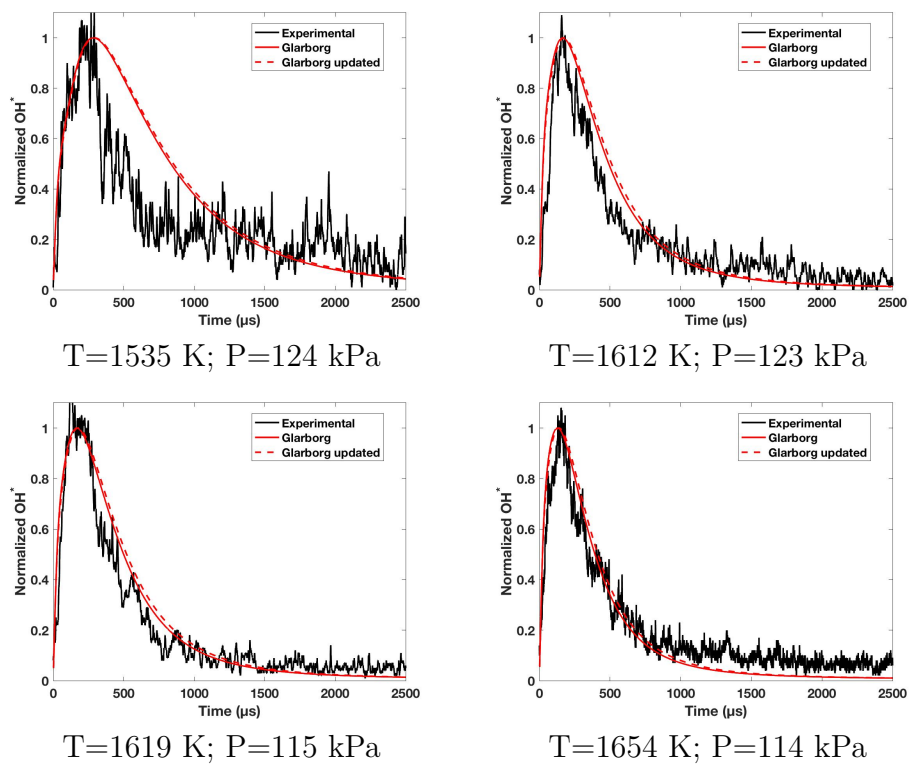

Figure 7: Experimental[5] and predicted normalized  $\text{OH}^*$  profiles during the oxidation of  $\text{H}_2$  by  $\text{NO}_2$ . Mixture:  $X_{\text{H}_2}=0.00222$ ,  $X_{\text{NO}_2}=0.00392$ ,  $X_{\text{Ar}}=0.99386$ . Model of Glarborg et al. [2].

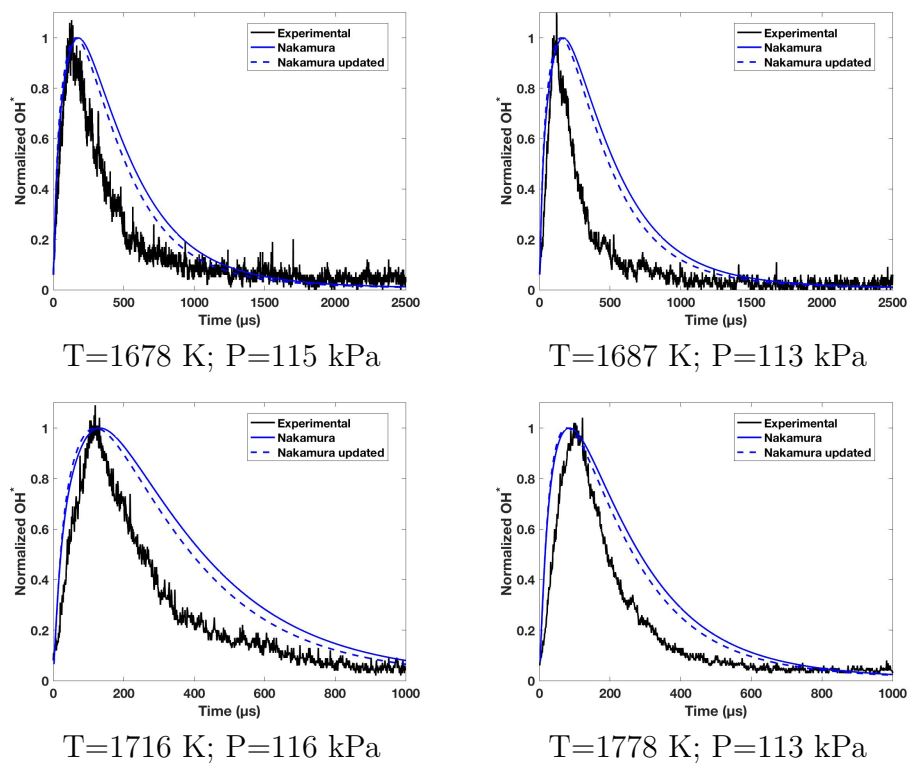

Figure 8: Experimental[5] and predicted normalized OH\* profiles during the oxidation of H<sub>2</sub> by NO<sub>2</sub>. Mixture: X<sub>H<sub>2</sub></sub>=0.00222, X<sub>NO<sub>2</sub></sub>=0.00392, X<sub>Ar</sub>=0.99386. Model of Nakamura et al. [3].

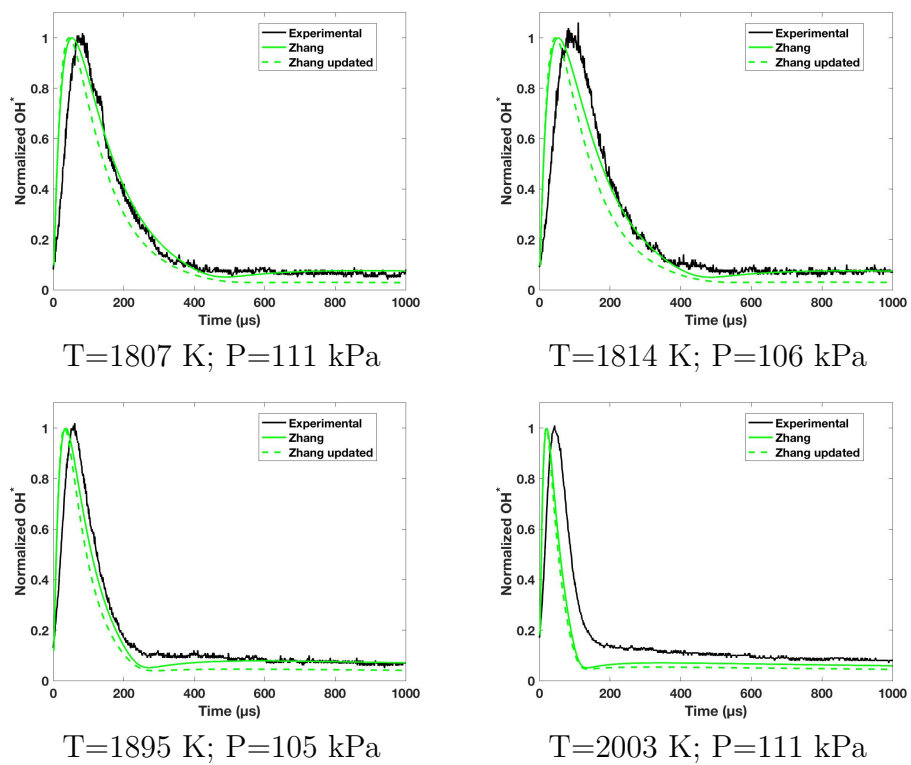

Figure 9: Experimental[5] and predicted normalized OH\* profiles during the oxidation of H<sub>2</sub> by NO<sub>2</sub>. Mixture:  $X_{H_2}=0.00222$ ,  $X_{NO_2}=0.00392$ ,  $X_{Ar}=0.99386$ . Model of Zhang et al. [4].

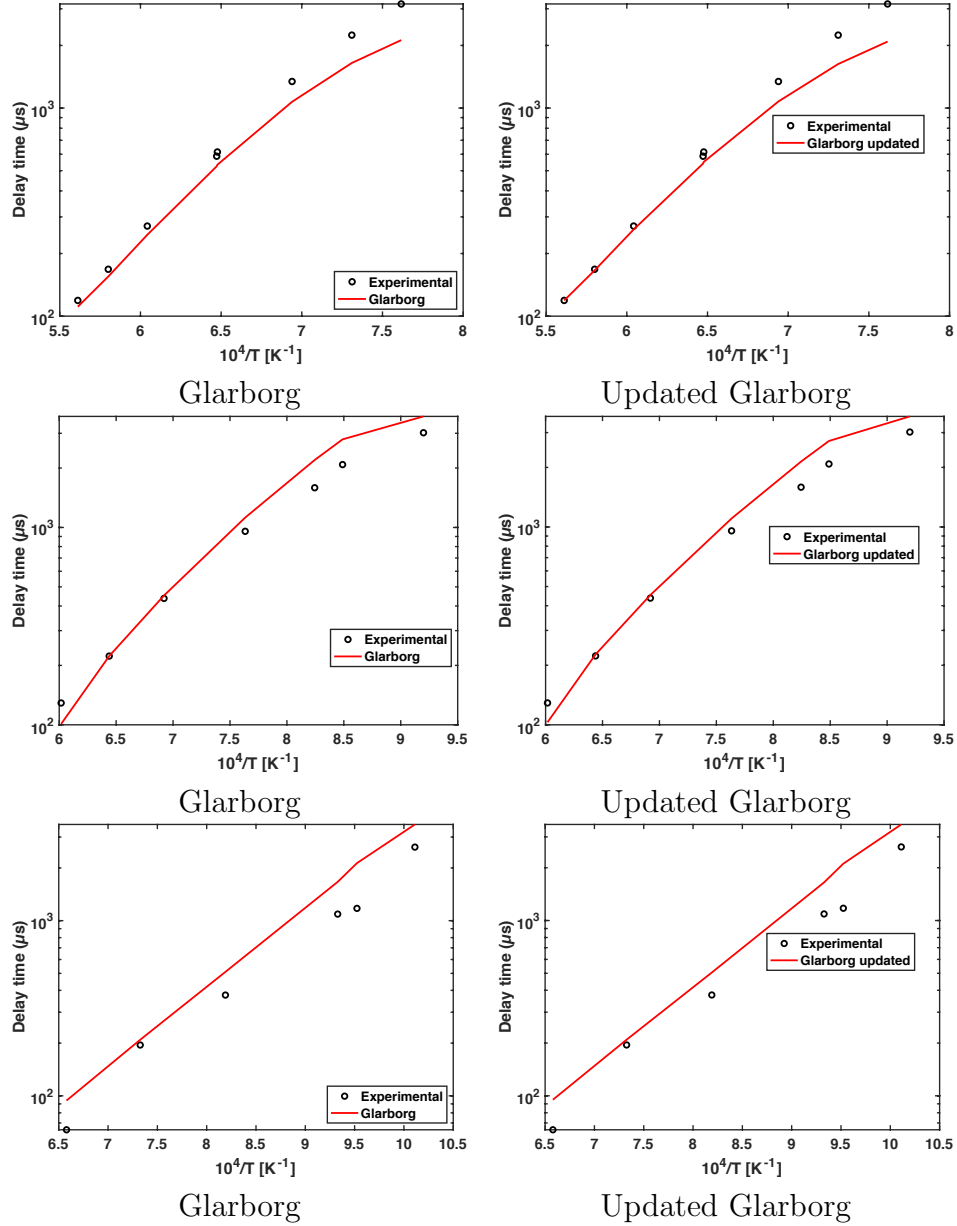

Figure 10: Experimental[6] and predicted delay-time during the oxidation of  $H_2$  by  $NO_2$ . The delay-time is defined as the time needed for the  $H_2O$  concentration to reach 50% of its maximum value within the experimental test time. In top figures, Mix 1:  $X_{H_2}=0.00222$ ,  $X_{NO_2}=0.00375$ ,  $X_{Ar}=0.99403$ . In middle figures, Mix 2:  $X_{H_2}=0.00444$ ,  $X_{NO_2}=0.00178$ ,  $X_{Ar}=0.99378$ . In bottom figures, Mix 3:  $X_{H_2}=0.01778$ ,  $X_{NO_2}=0.00168$ ,  $X_{Ar}=0.98054$ .  $T=989-1782$  K,  $P=97-128$  kPa. Results obtained with the model of Glarborg et al. [2] and its updated version.

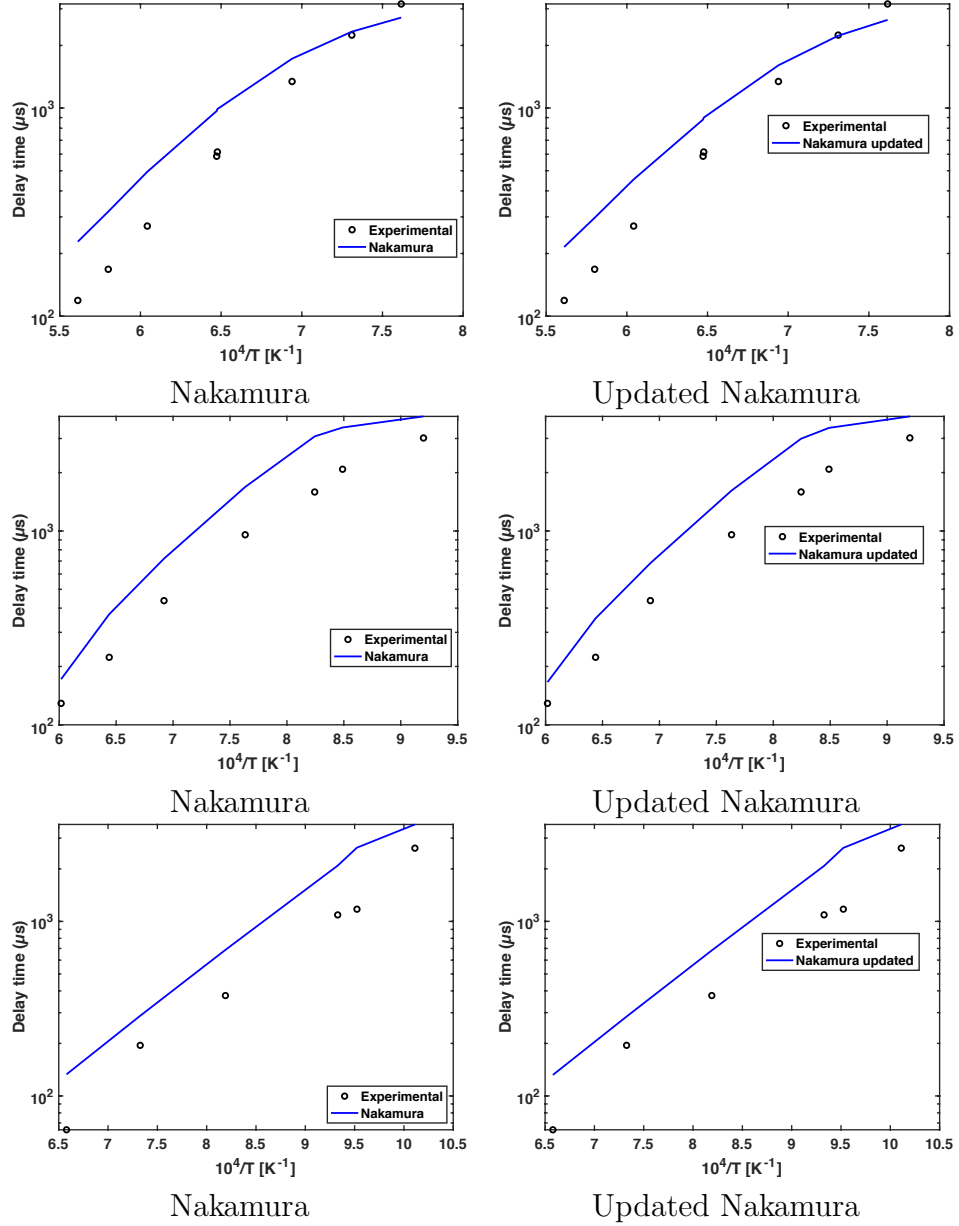

Figure 11: Experimental[6] and predicted delay-time during the oxidation of  $H_2$  by  $NO_2$ . The delay-time is defined as the time needed for the  $H_2O$  concentration to reach 50% of its maximum value within the experimental test time. In top figures, Mix 1:  $X_{H_2}=0.00222$ ,  $X_{NO_2}=0.00375$ ,  $X_{Ar}=0.99403$ . In middle figures, Mix 2:  $X_{H_2}=0.00444$ ,  $X_{NO_2}=0.00178$ ,  $X_{Ar}=0.99378$ . In bottom figures, Mix 3:  $X_{H_2}=0.01778$ ,  $X_{NO_2}=0.00168$ ,  $X_{Ar}=0.98054$ .  $T=989-1782$  K,  $P=97-128$  kPa. Results obtained with the model of Nakamura et al. [3] and its updated version.



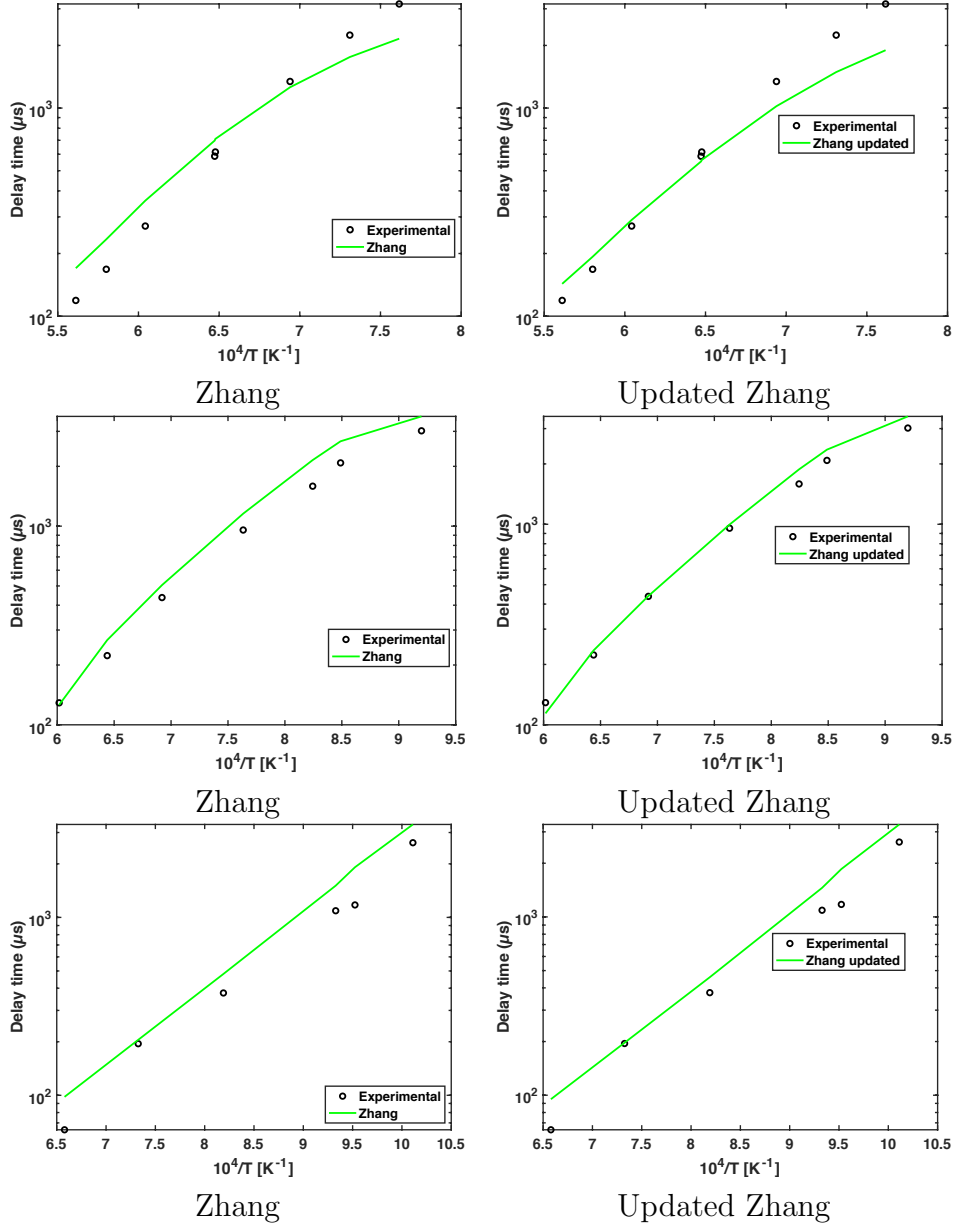

Figure 12: Experimental[6] and predicted delay-time during the oxidation of  $H_2$  by  $NO_2$ . The delay-time is defined as the time needed for the  $H_2O$  concentration to reach 50% of its maximum value within the experimental test time. In top figures, Mix 1:  $X_{H_2}=0.00222$ ,  $X_{NO_2}=0.00375$ ,  $X_{Ar}=0.99403$ . In middle figures, Mix 2:  $X_{H_2}=0.00444$ ,  $X_{NO_2}=0.00178$ ,  $X_{Ar}=0.99378$ . In bottom figures, Mix 3:  $X_{H_2}=0.01778$ ,  $X_{NO_2}=0.00168$ ,  $X_{Ar}=0.98054$ .  $T=989-1782$  K,  $P=97-128$  kPa. Results obtained with the model of Zhang et al. [4] and its updated version.

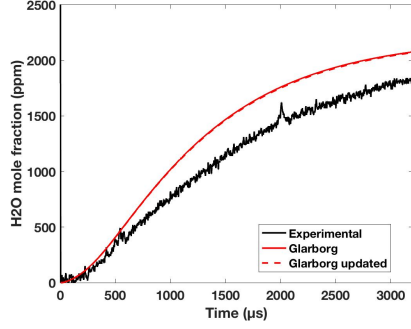

Mix 1; T=1441 K; P=112 kPa

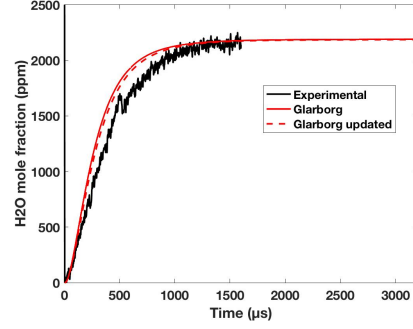

Mix 1; T=1655 K; P=105 kPa

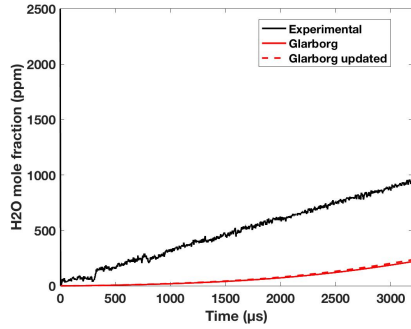

Mix 2; T=1087 K; P=124 kPa

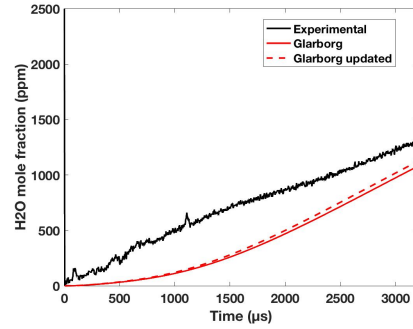

Mix 2; T=1178 K; P=126 kPa

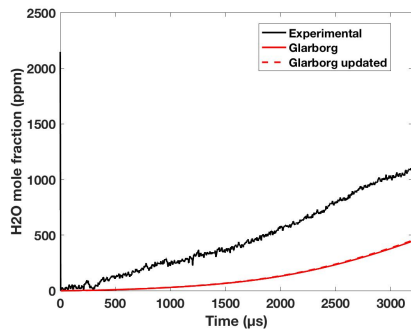

Mix 3; T=989 K; P=128 kPa

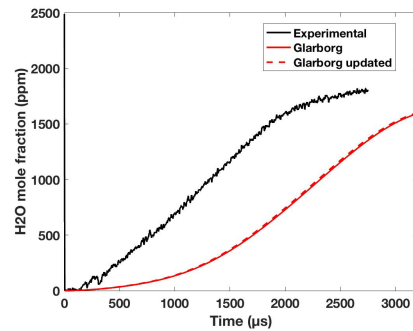

Mix 3; T=1050 K; P=123 kPa

Figure 13: Experimental[6] and predicted H<sub>2</sub>O profiles during the oxidation of H<sub>2</sub> by NO<sub>2</sub>. Mix 1:  $X_{H_2}=0.00222$ ,  $X_{NO_2}=0.00375$ ,  $X_{Ar}=0.99403$ ; Mix 2:  $X_{H_2}=0.00444$ ,  $X_{NO_2}=0.00178$ ,  $X_{Ar}=0.99378$ . Mix 3:  $X_{H_2}=0.01778$ ,  $X_{NO_2}=0.00168$ ,  $X_{Ar}=0.98054$ . Model of Glarborg et al. [2].

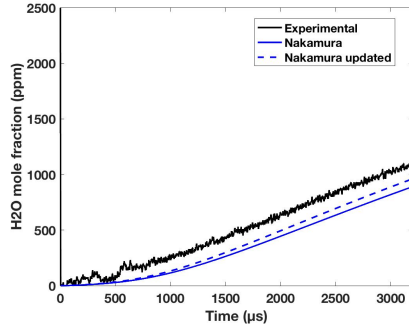

Mix 1; T=1313 K; P=121 kPa

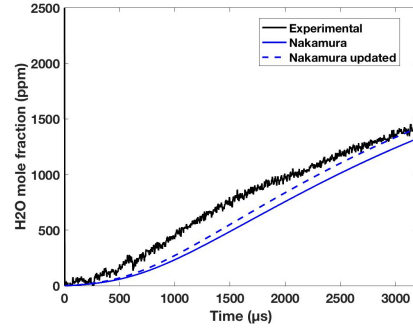

Mix 1; T=1368 K; P=116 kPa

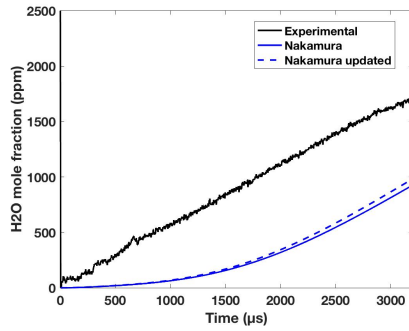

Mix 2; T=1213 K; P=117 kPa

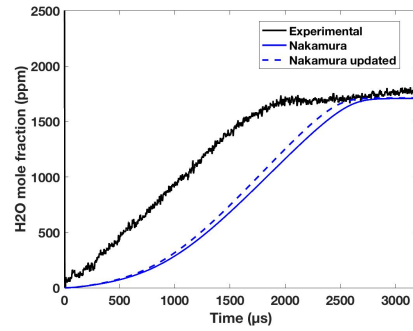

Mix 2; T=1310 K; P=115 kPa

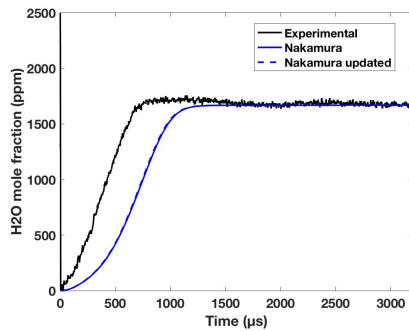

Mix 3; T=1221 K; P=119 kPa

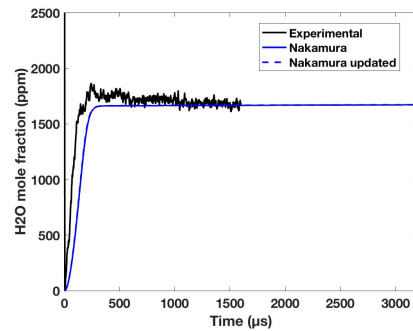

Mix 3; T=1520 K; P=124 kPa

Figure 14: Experimental[6] and predicted H<sub>2</sub>O profiles during the oxidation of H<sub>2</sub> by NO<sub>2</sub>. Mix 1:  $X_{H_2}=0.00222$ ,  $X_{NO_2}=0.00375$ ,  $X_{Ar}=0.99403$ ; Mix 2:  $X_{H_2}=0.00444$ ,  $X_{NO_2}=0.00178$ ,  $X_{Ar}=0.99378$ . Mix 3:  $X_{H_2}=0.01778$ ,  $X_{NO_2}=0.00168$ ,  $X_{Ar}=0.98054$ . Model of Nakamura et al. [3].

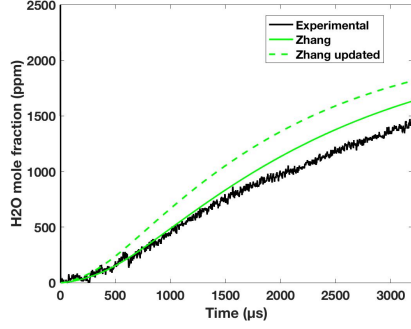

Mix 1; T=1368 K; P=116 kPa

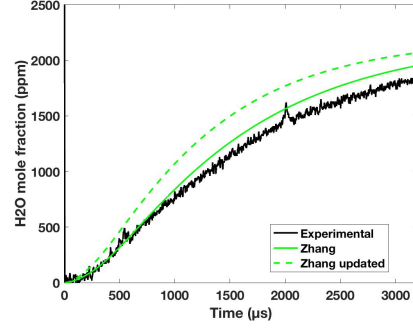

Mix 1; T=1441 K; P=112 kPa

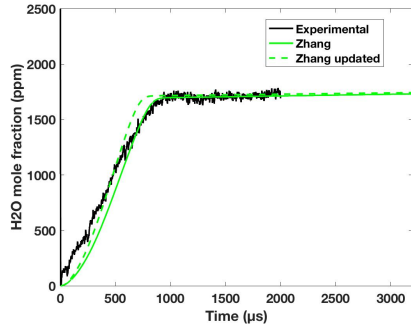

Mix 2; T=1445 K; P=114 kPa

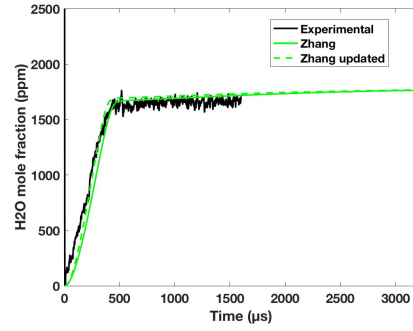

Mix 2; T=1553 K; P=110 kPa

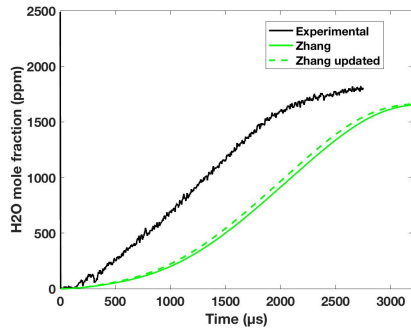

Mix 3; T=1050 K; P=123 kPa

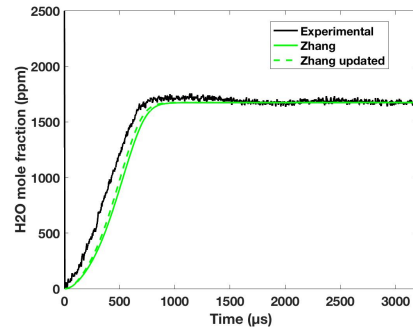

Mix 3; T=1221 K; P=119 kPa

Figure 15: Experimental[6] and predicted H<sub>2</sub>O profiles during the oxidation of H<sub>2</sub> by NO<sub>2</sub>. Mix 1:  $X_{H_2}=0.00222$ ,  $X_{NO_2}=0.00375$ ,  $X_{Ar}=0.99403$ ; Mix 2:  $X_{H_2}=0.00444$ ,  $X_{NO_2}=0.00178$ ,  $X_{Ar}=0.99378$ . Mix 3:  $X_{H_2}=0.01778$ ,  $X_{NO_2}=0.00168$ ,  $X_{Ar}=0.98054$ . Model of Zhang et al. [4].

### 3.3 Hydrogen oxidation by nitrogen dioxide and oxygen

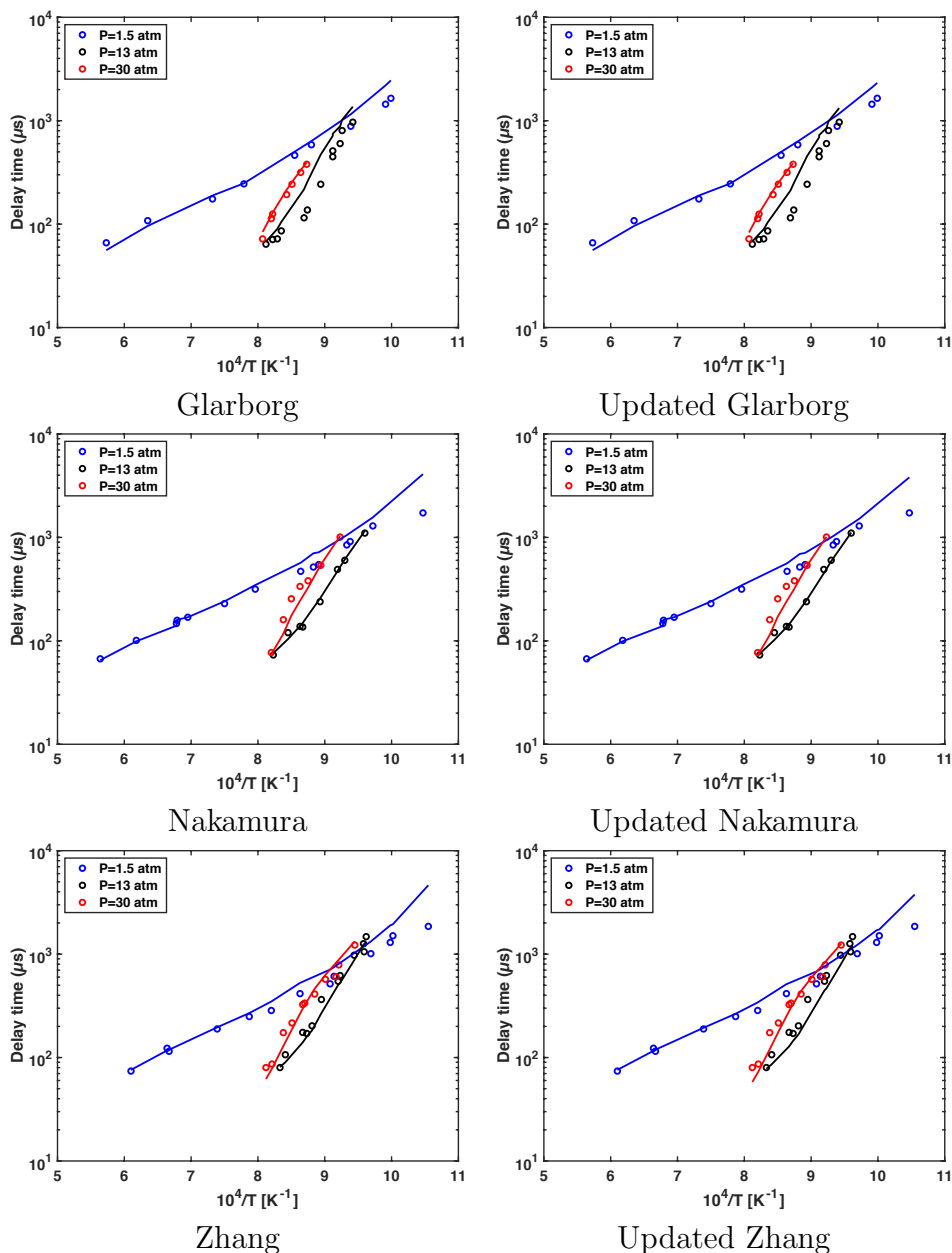

Figure 16: Experimental<sup>[7]</sup> and predicted delay-time during the oxidation of  $H_2$  by  $O_2$  with  $NO_2$  addition. The delay-time is defined as the base-line extrapolated maximum slope of the  $OH^*$  signal. In top figures:  $\Phi=0.3$ ,  $X_{NO_2}=100$  ppm,  $X_{Ar}=0.9799$ . In middle figures:  $\Phi=1$ ,  $X_{NO_2}=100$  ppm,  $X_{Ar}=0.9799$ . In bottom figures:  $\Phi=0.5$ ,  $X_{NO_2}=100$  ppm,  $X_{Ar}=0.9799$ . Results obtained with the models of Glarborg et al. [2], of Nakamura et al. [3], and of Zhang et al. [4] and its updated version.

### 3.4 Hydrogen oxidation by nitrogen oxides and dioxygen

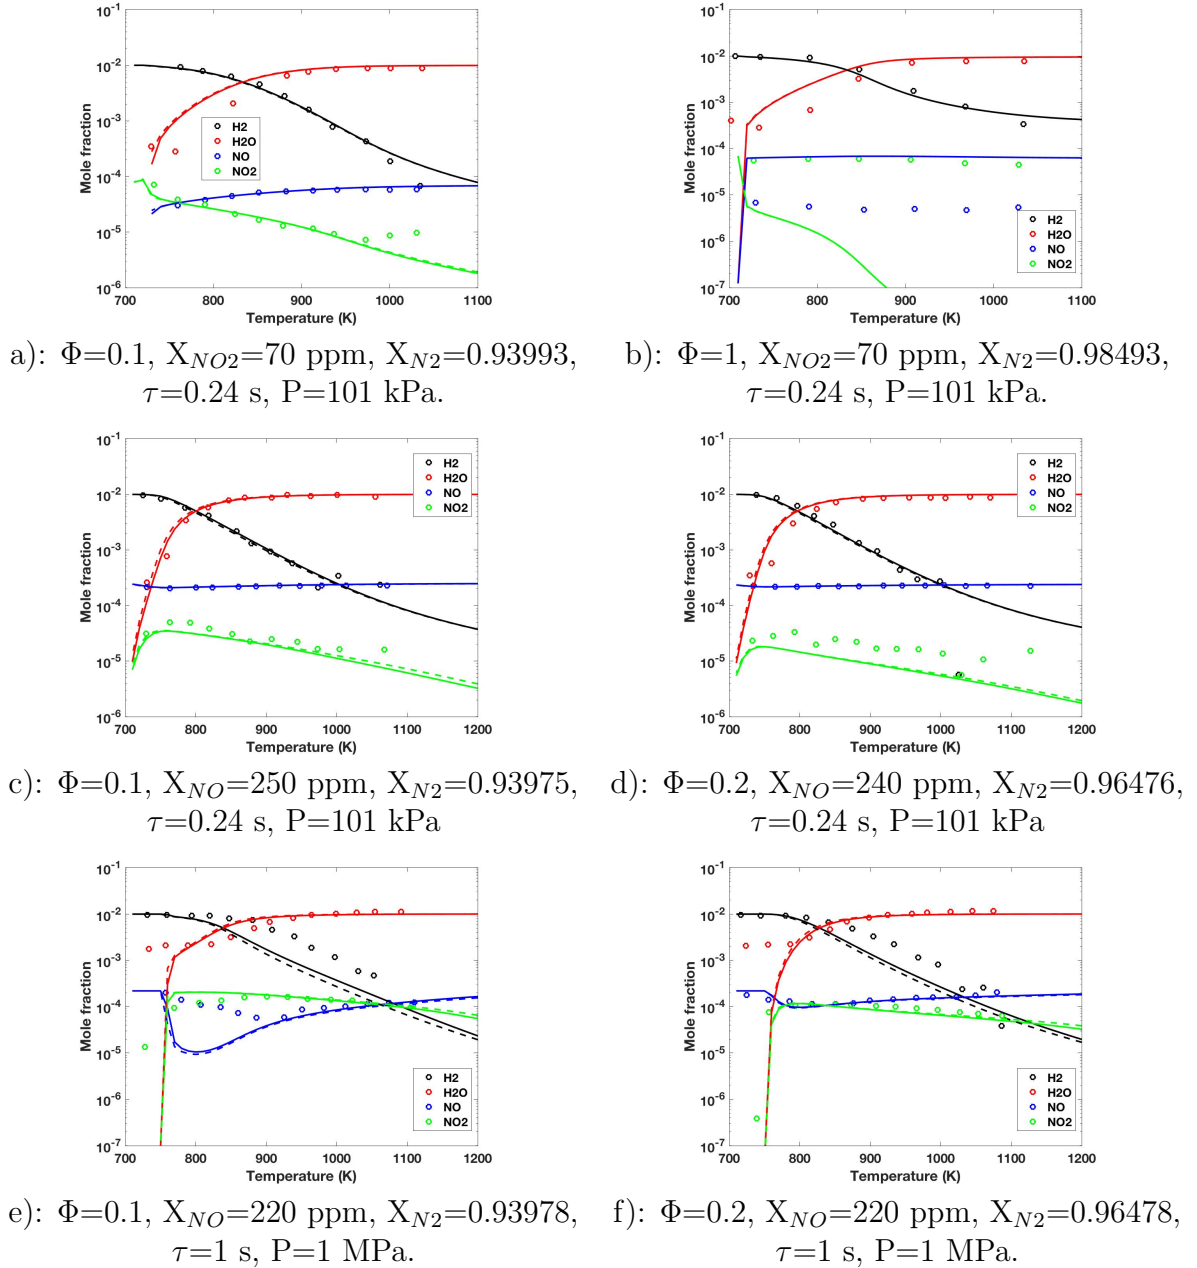

Figure 17: Experimental[8] and predicted species profiles during the oxidation in a jet-stirred reactor of  $H_2$  by  $O_2$  with NO addition. In top figures: Glarborg et al. [2] and its updated version. In middle figures: Nakamura et al. [3] and its updated version. In bottom figures: Zhang et al. [4] and its updated version. Original models: solid lines. Updated models: dashed lines.

## References

- [1] **Estupian E., Nicovich J. and Wine P.:** A temperature-dependent kinetics study of the important stratospheric reaction  $O(^3P)+NO_2 \rightarrow O_2+NO$ . *The Journal of Physical Chemistry A*, 2001, vol 105, n° 42, p. 9697–9703.
- [2] **Glarborg P., Miller J., Ruscic B. and Klippenstein S.:** Modeling nitrogen chemistry in combustion. *Progress in Energy and Combustion Science*, 2018, vol 67, p. 31–68.
- [3] **Nakamura H., Hasegawa S. and Tezuka T.:** Kinetic modeling of ammonia/air weak flames in a micro flow reactor with a controlled temperature profile. *Combustion and Flame*, 2017, vol 185, p. 16–27.
- [4] **Zhang Y., Mathieu O., Petersen E., Bourque G. and Curran H.:** Assessing the predictions of a NOx kinetic mechanism on recent hydrogen and syngas experimental data. *Combustion and Flame*, 2017, vol 182, p. 122 – 141.
- [5] **Mulvihill C. and Petersen E.:** OH\* chemiluminescence in the H<sub>2</sub>-NO<sub>2</sub> and H<sub>2</sub>-N<sub>2</sub>O systems. *Combustion and Flame*, 2020, vol 213, p. 291–301.
- [6] **Mulvihill C., Mathieu O. and Petersen E.:** H<sub>2</sub>O time histories in the H<sub>2</sub>-NO<sub>2</sub> system for validation of NOx hydrocarbon kinetics mechanisms. *International Journal of Chemical kinetics*, 2019, vol 51, n° 9, p. 669–678.
- [7] **Mathieu O., Levacque A. and Petersen E.:** Effects of NO<sub>2</sub> addition on hydrogen ignition behind reflected shock waves. *Proceedings of the Combustion Institute*, 2013, vol 34, p. 633–640.
- [8] **Dagaut P. and Dayma G.:** Effects of air contamination on the combustion of hydrogen - Effect of NO and NO<sub>2</sub> addition on hydrogen ignition and oxidation kinetics. *Combustion Science and Technology*, 2006, vol 178, p. 1999–2024.
